# Supplementary material for: Exposure to Vitamin D Fortification Policy in Prenatal Life and the Risk of Childhood Asthma: Results from the D-Tect Study
Source: PubMed Central journal article supplement (PMC6521227; doi:10.3390/nu11040924), 2019-04-24
Supplement: nutrients-11-00924-s001.pdf [file nutrients-11-00924-s001.pdf]

**Supplementary table 1.** Characteristics of the study population in numbers and percentages.

|                           | <b>Exposed (n=106,347)</b> |      | <b>Unexposed (n=115,900)</b> |      |
|---------------------------|----------------------------|------|------------------------------|------|
|                           | N                          | %    | N                            | %    |
| Girls                     | 51,724                     | 48.6 | 56,036                       | 48.4 |
| Boys                      | 54,623                     | 51.4 | 59,864                       | 51.6 |
| January                   | 8,236                      | 7.74 | 9,073                        | 7.83 |
| February                  | 8,165                      | 7.68 | 8,685                        | 7.49 |
| March                     | 9,495                      | 8.93 | 10,329                       | 8.91 |
| April                     | 9,700                      | 9.12 | 10,225                       | 8.82 |
| May                       | 9,680                      | 9.10 | 10,314                       | 8.90 |
| June                      | 9,227                      | 8.68 | 10,244                       | 8.84 |
| July                      | 9,261                      | 8.71 | 10,426                       | 9.00 |
| August                    | 9,261                      | 8.71 | 10,386                       | 8.96 |
| September                 | 8,926                      | 8.39 | 9,712                        | 8.38 |
| October                   | 8,652                      | 8.14 | 9,149                        | 7.89 |
| November                  | 8,046                      | 7.57 | 8,585                        | 7.41 |
| December                  | 7,698                      | 7.24 | 8,772                        | 7.57 |
| Asthma <sup>†</sup> cases | 1,427                      | 1.3  | 1,613                        | 1.4  |
| Girls                     | 515                        | 36.1 | 562                          | 34.8 |
| 0–3 years                 | 146                        | 28.4 | 153                          | 27.2 |
| 4–6 years                 | 221                        | 42.9 | 248                          | 44.1 |
| 7–9 years                 | 148                        | 28.7 | 161                          | 28.7 |
| Boys                      | 912                        | 63.9 | 1,051                        | 65.2 |
| 0–3 years                 | 247                        | 27.1 | 345                          | 32.8 |
| 4–6 years                 | 375                        | 41.1 | 434                          | 41.3 |
| 7–9 years                 | 290                        | 31.8 | 272                          | 25.9 |
| Censoring                 | 104,920                    | 98.7 | 114,287                      | 98.6 |
| Died                      | 875                        | 0.8  | 993                          | 0.9  |
| Lost to follow up         | 909                        | 0.9  | 981                          | 0.8  |
| End of follow up          | 103,136                    | 98.3 | 112,313                      | 98.3 |

<sup>†</sup> Inpatient discharge diagnoses of asthma in the Danish National Patient Register.
